# Supplementary material for: Dominant Modes of Tibetan Plateau Summer Surface Sensible Heating and Associated Atmospheric Circulation Anomalies
Source: MDPI journal article supplement (doi:10.3390/rs14040956), 2022-02-16
Supplement: s1 [file s1]

Archive with 1 entries (1 files):
- remotesensing-1565491-supplementary.pdf
