# Supplementary material for: Dominant Modes of Tibetan Plateau Summer Surface Sensible Heating and Associated Atmospheric Circulation Anomalies
Source: MDPI journal article supplement (doi:10.3390/rs14040956), 2022-02-16
Supplement: s1 [file s1 › remotesensing-1565491-supplementary.pdf]

Supplementary Material for

# Dominant Modes of Tibetan Plateau Summer Surface Sensible Heating and Associated Atmospheric Circulation Anomalies

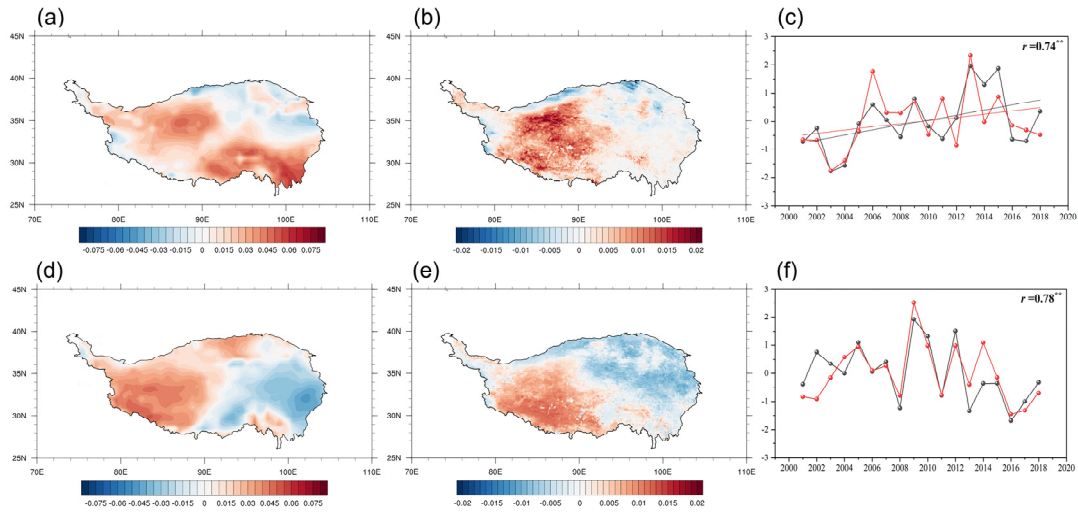

**Figure S1.** The first two EOFs of summer SH over the TP for the period 2001-2018 derived from ERA-Interim (a,d) and remote sensing data (b,e). Normalized time series of PC1 (c) and PC2 (f) derived from ERA-Interim (black line) and remote sensing data (red line).
